# Supplementary material for: Protein-Pacing and Multi-Component Exercise Training Improves Physical Performance Outcomes in Exercise-Trained Women: The PRISE 3 Study
Source: PubMed Central journal article supplement (PMC4924173; doi:10.3390/nu8060332), 2016-06-01
Supplement: nutrients-08-00332-s001.pdf [file nutrients-08-00332-s001.pdf]

# Supplementary Materials: Protein-Pacing and Multi-Component Exercise Training Improves Physical Performance Outcomes in Exercise-Trained Women: The PRISE 3 Study

Paul J. Arciero, Stephen J. Ives, Chelsea Norton, Daniela Escudero, Olivia Minicucci, Gabe O'Brien, Maia Paul, Michael J. Ormsbee, Vincent Miller, Caitlin Sheridan and Feng He

Table S1. RISE Exercise Training Protocol.

| Exercise       | Type | Work                                      | RPE  | Monday | Tuesday | Wednesday | Thursday | Friday | Saturday/Sunday |
|----------------|------|-------------------------------------------|------|--------|---------|-----------|----------|--------|-----------------|
| Resistance (R) | WB   | 2–3 sets/exercise<br>10–15 reps           | 7–9  | WB     | ---     | ---       | ---      | ---    | ---             |
| Intervals (I)  | C    | 7–10 sets<br>30–60 s work<br>2–4 min rest | 10/3 | ---    | X       | RECOVERY  | ---      | ---    | RECOVERY        |
| Stretching (S) | S    | ≤60 min                                   | 7–8  | ---    | ---     | ---       | WB       | ---    | ---             |
| Endurance (E)  | C    | ≥60min                                    | 6    | ---    | ---     | ---       | ---      | X      | ---             |

RPE: rating of perceived effort; C: choice of exercise modality; WB: whole body exercise; S: stretching exercise; X: exercise day. Exercise modalities available for C include: running, cycling, swimming, elliptical, rowing, cross-country skiing, *etc.*

Table S2. Sample Menus from the CON and PRISE nutritional intervention diet plans during the 12 week intervention. Menus were isocaloric and similar in meal timing.

|                     | CON (1.0 g/kg-BW/Day)                                                                                                                            | PRISE (2.0 g/kg-BW/Day)                                                                                                                  |
|---------------------|--------------------------------------------------------------------------------------------------------------------------------------------------|------------------------------------------------------------------------------------------------------------------------------------------|
| Breakfast           | Steel cut oats, eggs; honey, nut/seed butter, fruit, caffeine beverage, One-A-Day Multivitamins®; 12 g protein; 30 g carbohydrate; 15 g fat      | Eggs/egg whites, blueberries, coconut butter/milk, e+® caffeine beverage, Ageless Essentials®; 25 g protein; 15 g carbohydrate; 15 g fat |
| Mid-morning snack   | Nature Valley Protein Chewy Bars®; 10 g protein, 14 g carbohydrate, 12 g fat                                                                     | IsaPro®, 1.5 scoops, fresh fruit, 27 g protein; 3 g carbohydrate; 1.5 g fat                                                              |
| Lunch               | Whole grain pita, tuna/turkey/chicken, baked chips, fresh fruit; 15 g protein; 30 g carbohydrate; 15 g fat                                       | IsaLean Pro®; 36 g protein; 21 g carbohydrate; 6 g fat                                                                                   |
| Mid-Afternoon snack | Nature Valley Sweet and Salty Nut Granola Bars®, Horizon Organic Milk®; 12 g protein, 42 g carbohydrate, 10 g fat                                | IsaLean Bars®, ½ cup of yogurt or fruit; 18 g protein; 30 g carbohydrate; 5 g fat                                                        |
| Dinner              | Fish/poultry/beef, whole grain rice/pasta or legumes, fresh vegetables, dried fruit, olive oil, water; 15 g protein; 30 g carbohydrate; 15 g fat | Fish/poultry/beef, fresh vegetables, chopped nuts, dried fruit, olive oil, milk; 25 g protein; 20 g carbohydrate; 15 g fat               |
| Evening snack       | Fresh fruit, nuts; 2–3 g protein; 20 g carbohydrate; 9 g fat                                                                                     | Greek yogurt, fruit; Ionix Supreme®; 5 g protein; 20 g carbohydrate; 5 g fat                                                             |
| Exercise Days *     | Gatorade G2®, Electrolyte beverage                                                                                                               | Replenish®, Electrolyte beverage                                                                                                         |

CON: protein based on 1.0g/kg-BW/day for a 64 kg-women; PRISE: protein based on 2.0g/kg-BW/day for a 64 kg-women. Meals were consumed ~3 h apart throughout the day.
